# Supplementary material
Source: publisher figshare collection journal article supplement (https://karger.figshare.com/articles/dataset/_/28582598)
Supplement: Supplementary file 1 [file 1]

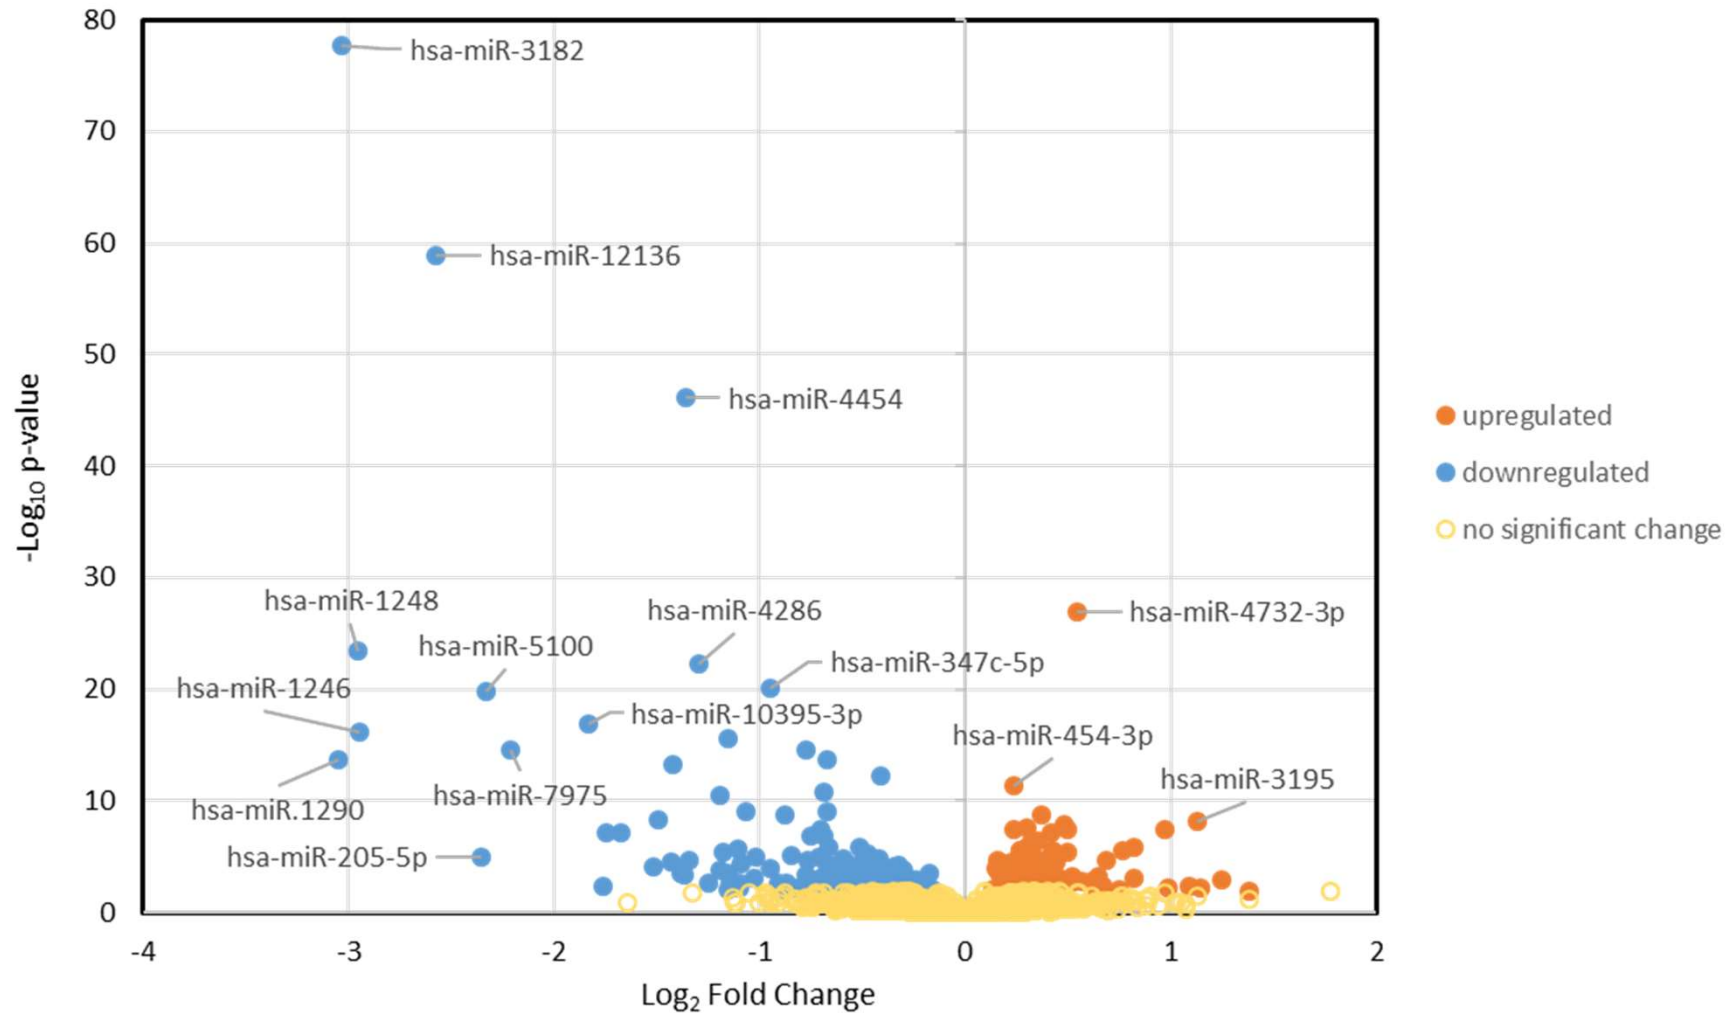

**Supplementary Fig. 1. Volcano plots illustrating the relationship between  $\log_2$  fold change (x-axis) and  $-\log_{10}$  adjusted p-value (y-axis) of 1945 miRNAs in the umbilical cord blood of SARS-CoV-2 term-born exposed neonates ( $n = 38$ ) compared to term-born controls ( $n = 32$ ). Orange points indicate upregulated miRNAs ( $LFC > 0$ ,  $p$ -adjusted  $< 0.05$ ), blue points show downregulated miRNAs ( $LFC < 0$ ,  $p$ -adjusted  $< 0.05$ ).**
