# Supplementary material
Source: publisher figshare collection journal article supplement (https://karger.figshare.com/articles/dataset/_/28582598)
Supplement: Supplementary file 2 [file 1]

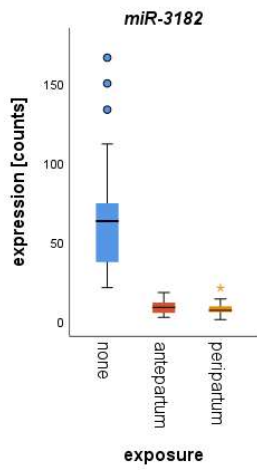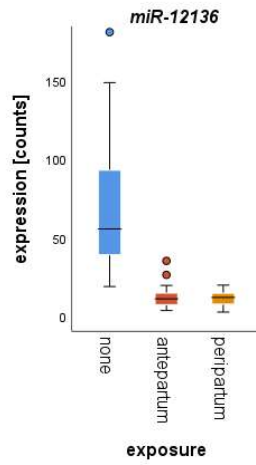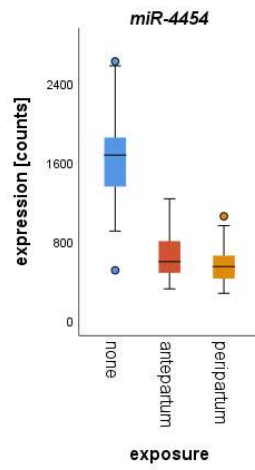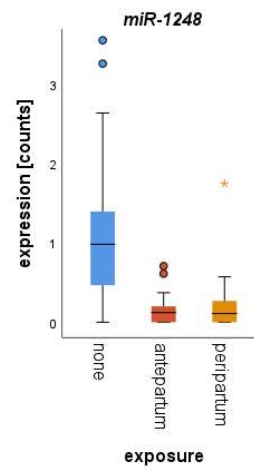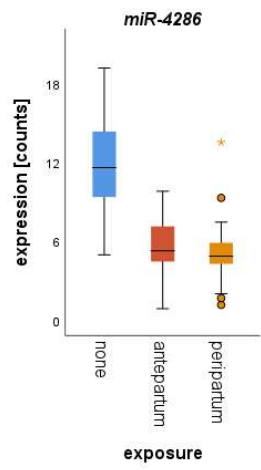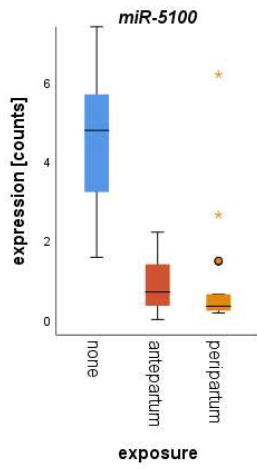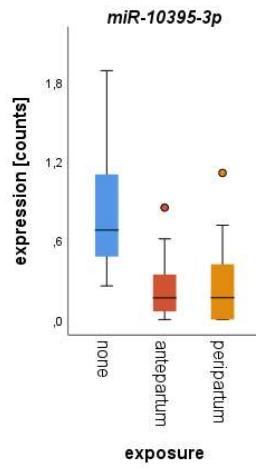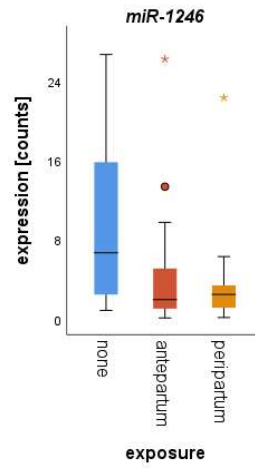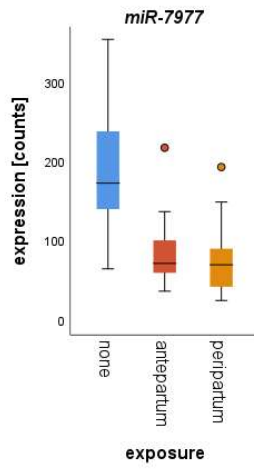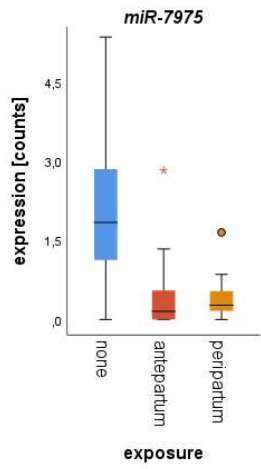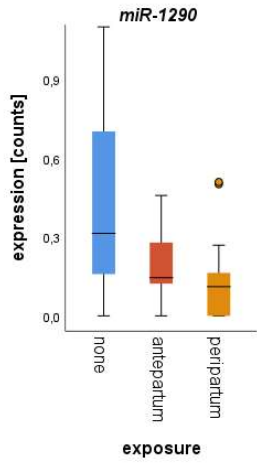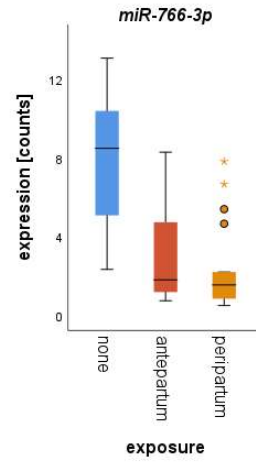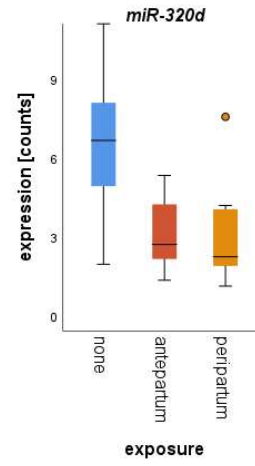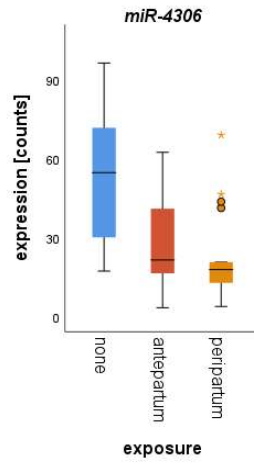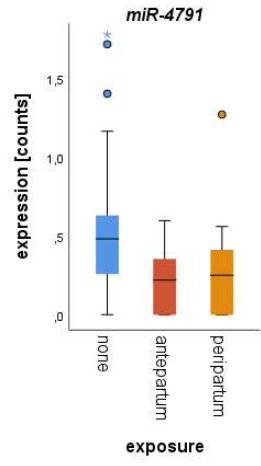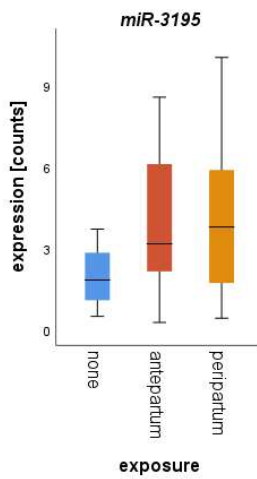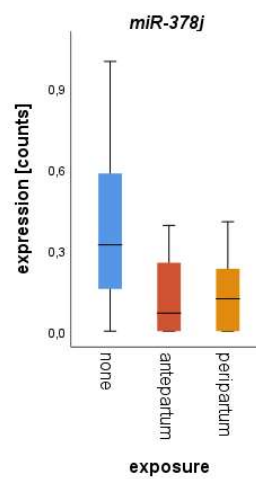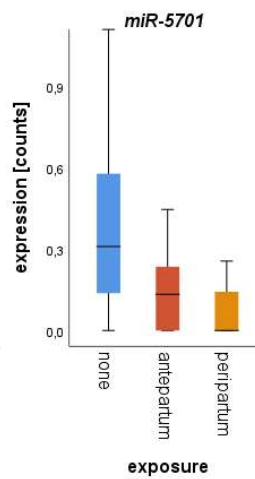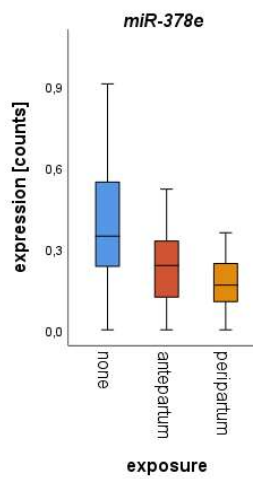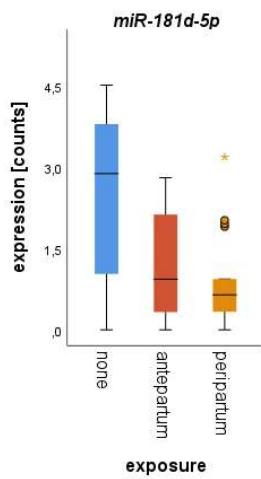

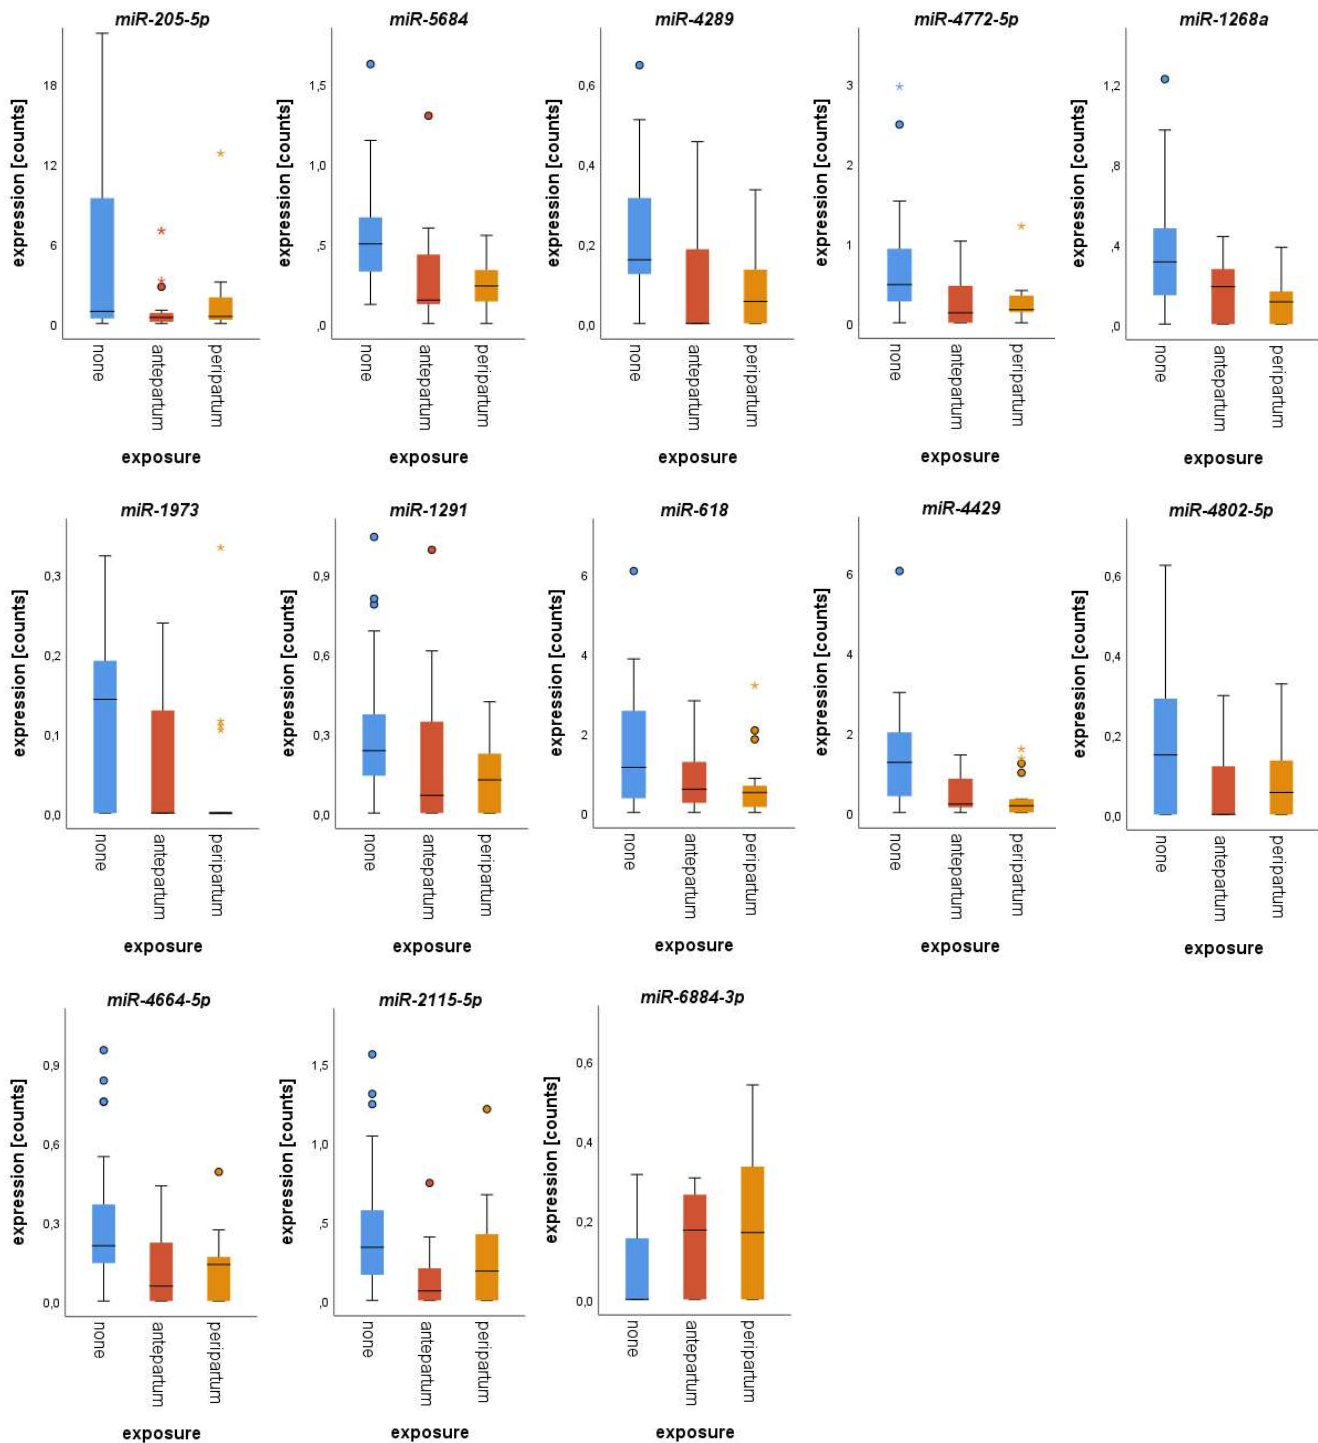

**Supplementary Fig. 2. Boxplot of miRNA expression [log2(counts)] in umbilical cord blood of term-born neonates with none (n = 32), antepartum (n = 20) or peripartum (n = 18) SARS-CoV-2-exposure.** Represented are all significantly differentially expressed miRNAs at a more conservative threshold of  $|LFC| > 1$  and  $p < 0.01$  between healthy controls and SARS-CoV-2 exposed neonates. Center lines in the boxes represent medians, box edges mark 1st and 3rd quartiles, and whiskers indicate 5th and 95th percentiles. Circles represent outliers, and asterisks denote extreme values.
